# Supplementary material
Source: bioRxiv or medRxiv preprint supplement (https://www.biorxiv.org/content/biorxiv/early/2019/03/05/568147/DC8/embed/media-8.pdf)
Supplement: Supplementary file [file media-8.pdf]

Table S2

| gene_name     | log2 of DESeq normalized counts |         |         |         |         |         |         |         |         |         |
|---------------|---------------------------------|---------|---------|---------|---------|---------|---------|---------|---------|---------|
|               | hD1                             | hD7     | hD8     | hD9     | hD10    | iP2     | iP3     | iP5     | iP6     | iP7     |
| SPC24         | 5,78136                         | 6,06609 | 6,50779 | 6,14975 | 6,24793 | 4,52356 | 6,00000 | 4,52356 | 4,70044 | 5,20945 |
| TMEM38A       | 5,58496                         | 7,10852 | 5,83289 | 6,30378 | 6,33985 | 4,16993 | 5,32193 | 4,24793 | 4,85798 | 4,75489 |
| TMEM229B      | 4,58496                         | 5,78136 | 5,83289 | 5,70044 | 6,49185 | 5,55459 | 5,39232 | 3,90689 | 4,16993 | 3,70044 |
| SLC39A5       | 5,04439                         | 5,24793 | 6,80735 | 6,42626 | 6,06609 | 4,08746 | 5,32193 | 3,00000 | 3,58496 | 5,12928 |
| PDE4C         | 4,70044                         | 5,72792 | 6,91886 | 5,04439 | 6,98868 | 4,39232 | 3,90689 | 3,90689 | 3,16993 | 5,52356 |
| COLCA2        | 4,24793                         | 6,89482 | 6,04439 | 4,58496 | 7,05528 | 3,00000 | 5,12928 | 4,08746 | 4,24793 | 3,80735 |
| ME1           | 4,32193                         | 6,04439 | 4,90689 | 5,16993 | 7,12928 | 4,16993 | 4,32193 | 2,80735 | 4,32193 | 4,70044 |
| HHAT          | 5,64386                         | 5,55459 | 5,45943 | 4,80735 | 4,58496 | 3,90689 | 5,20945 | 4,16993 | 3,00000 | 4,08746 |
| UAP1L1        | 5,32193                         | 5,24793 | 5,39232 | 4,58496 | 5,80735 | 3,45943 | 4,58496 | 4,08746 | 3,00000 | 4,08746 |
| RAB6B         | 5,75489                         | 5,42626 | 5,67243 | 4,52356 | 5,42626 | 4,75489 | 3,58496 | 4,08746 | 3,16993 | 4,08746 |
| BHLHE41       | 5,42626                         | 6,06609 | 5,78136 | 4,90689 | 5,93074 | 4,32193 | 4,70044 | 3,58496 | 4,70044 | 4,32193 |
| KLHL17        | 4,75489                         | 5,35755 | 5,88264 | 5,08746 | 5,00000 | 3,45943 | 3,80735 | 4,39232 | 4,85798 | 4,08746 |
| NBPF3         | 6,32193                         | 6,12928 | 5,78136 | 3,58496 | 6,47573 | 4,00000 | 4,39232 | 3,90689 | 3,58496 | 4,24793 |
| C2CD4B        | 4,75489                         | 5,45943 | 6,56986 | 3,80735 | 6,06609 | 3,00000 | 4,70044 | 4,00000 | 3,58496 | 4,08746 |
| CTC1          | 6,18982                         | 5,35755 | 5,24793 | 6,52356 | 5,70044 | 5,04439 | 5,32193 | 4,85798 | 3,58496 | 4,80735 |
| C15orf38      | 5,42626                         | 5,64386 | 5,45943 | 5,58496 | 6,08746 | 5,32193 | 5,04439 | 4,52356 | 3,00000 | 4,32193 |
| CDHR5         | 5,67243                         | 6,20945 | 6,47573 | 6,30378 | 5,97728 | 4,45943 | 4,70044 | 5,72792 | 2,80735 | 5,24793 |
| ECM1          | 4,75489                         | 6,44294 | 5,32193 | 5,20945 | 5,80735 | 4,08746 | 4,80735 | 4,90689 | 3,58496 | 4,45943 |
| NBPF14        | 4,85798                         | 5,12928 | 5,28540 | 6,28540 | 5,32193 | 3,32193 | 4,85798 | 4,75489 | 3,70044 | 4,70044 |
| SYT17         | 5,78136                         | 5,88264 | 6,40939 | 5,52356 | 5,49185 | 3,00000 | 5,42626 | 5,16993 | 4,52356 | 4,16993 |
| CHST11        | 6,16993                         | 5,20945 | 5,00000 | 5,67243 | 5,61471 | 3,45943 | 3,90689 | 3,80735 | 4,24793 | 4,52356 |
| DHRS13        | 5,97728                         | 4,70044 | 4,80735 | 6,39232 | 5,95420 | 2,32193 | 3,80735 | 4,58496 | 3,70044 | 5,16993 |
| DIAPH2        | 6,06609                         | 5,75489 | 4,08746 | 5,52356 | 5,88264 | 2,58496 | 5,28540 | 4,32193 | 3,45943 | 4,85798 |
| ZNF488        | 6,20945                         | 4,08746 | 6,53916 | 6,12928 | 5,78136 | 2,58496 | 4,95420 | 3,70044 | 2,80735 | 5,32193 |
| PDZD3         | 6,06609                         | 7,03342 | 6,53916 | 6,53916 | 6,75489 | 1,00000 | 6,28540 | 3,00000 | 5,58496 | 4,95420 |
| MECOM         | 5,83289                         | 6,71425 | 5,08746 | 6,40939 | 5,61471 | 1,58496 | 5,12928 | 4,39232 | 5,49185 | 3,58496 |
| CLRN3         | 6,20945                         | 5,61471 | 5,88264 | 5,88264 | 7,51570 | 1,00000 | 5,39232 | 4,64386 | 4,32193 | 6,59991 |
| CA2           | 5,16993                         | 6,93074 | 6,40939 | 6,26679 | 7,43463 | 1,58496 | 4,52356 | 3,58496 | 3,45943 | 5,00000 |
| SPP1          | 6,04439                         | 6,04439 | 5,70044 | 7,62205 | 6,40939 | 4,16993 | 4,70044 | 5,78136 | 6,42626 | 4,45943 |
| PIGB          | 6,35755                         | 5,52356 | 4,64386 | 8,24793 | 5,83289 | 3,00000 | 5,83289 | 5,16993 | 5,83289 | 4,58496 |
| RP11-159D12.5 | 6,84549                         | 7,30378 | 4,80735 | 6,33985 | 6,53916 | 3,45943 | 5,12928 | 5,55459 | 5,35755 | 5,16993 |
| ELFN2         | 6,90689                         | 6,83289 | 7,34873 | 6,75489 | 6,91886 | 5,12928 | 5,45943 | 4,70044 | 5,32193 | 5,42626 |
| TTC39A        | 6,75489                         | 6,22882 | 6,91886 | 5,70044 | 6,20945 | 5,78136 | 5,45943 | 5,20945 | 5,08746 | 5,00000 |
| PIDD          | 5,88264                         | 6,74147 | 7,53138 | 6,83289 | 6,00000 | 5,12928 | 4,64386 | 5,93074 | 5,78136 | 5,08746 |
| GPRIN2        | 5,95420                         | 5,58496 | 7,65105 | 6,39232 | 5,58496 | 5,49185 | 5,75489 | 5,20945 | 4,24793 | 5,72792 |
| CCDC24        | 5,39232                         | 5,52356 | 6,94251 | 8,01123 | 5,58496 | 5,08746 | 5,49185 | 5,52356 | 5,20945 | 4,80735 |
| SLC6A20       | 5,45943                         | 7,00000 | 8,34430 | 6,18982 | 7,28540 | 3,45943 | 5,88264 | 6,02237 | 5,04439 | 5,70044 |
| DACT2         | 4,95420                         | 6,97728 | 7,55459 | 5,97728 | 7,03342 | 5,61471 | 6,37504 | 5,88264 | 4,95420 | 2,58496 |
| ZBED3         | 5,88264                         | 6,88264 | 6,33985 | 4,24793 | 6,56986 | 4,80735 | 4,90689 | 5,58496 | 4,90689 | 4,08746 |
| EHD2          | 5,20945                         | 6,96578 | 5,90689 | 5,49185 | 6,02237 | 4,00000 | 3,16993 | 5,61471 | 3,70044 | 3,00000 |
| WNK2          | 5,67243                         | 6,62936 | 7,27612 | 5,80735 | 6,04439 | 4,64386 | 4,95420 | 4,39232 | 4,70044 | 2,58496 |
| EVC           | 5,58496                         | 6,06609 | 5,28540 | 5,78136 | 6,02237 | 3,58496 | 5,45943 | 5,04439 | 4,90689 | 2,32193 |
| NAGPA         | 5,88264                         | 5,61471 | 6,16993 | 7,01123 | 7,14975 | 5,20945 | 5,61471 | 5,67243 | 4,95420 | 5,04439 |
| CYP2C18       | 6,28540                         | 5,70044 | 6,24793 | 6,62936 | 6,88264 | 5,20945 | 5,24793 | 4,85798 | 4,24793 | 5,45943 |
| TMEM86B       | 5,88264                         | 5,78136 | 6,53916 | 6,12928 | 7,37504 | 5,08746 | 6,04439 | 5,78136 | 3,45943 | 4,95420 |
| DHRS11        | 6,00000                         | 6,74147 | 7,05528 | 7,40939 | 6,35755 | 5,20945 | 6,22882 | 6,00000 | 3,16993 | 6,32193 |
| ZXDC          | 6,56986                         | 6,52356 | 5,72792 | 6,91886 | 6,47573 | 5,42626 | 5,97728 | 6,35755 | 3,16993 | 4,45943 |
| SLC12A8       | 5,61471                         | 6,39232 | 6,30378 | 7,09803 | 5,72792 | 4,64386 | 5,24793 | 5,39232 | 5,39232 | 5,24793 |
| LYPD6         | 6,16993                         | 5,85798 | 6,30378 | 6,67243 | 5,32193 | 4,24793 | 4,70044 | 5,20945 | 4,70044 | 5,39232 |
| RMI2          | 6,44294                         | 6,37504 | 5,95420 | 7,49185 | 6,47573 | 5,08746 | 4,52356 | 5,28540 | 5,08746 | 6,59991 |
| HMHA1         | 6,79442                         | 6,02237 | 5,72792 | 6,82018 | 4,90689 | 4,08746 | 5,49185 | 4,80735 | 3,58496 | 5,95420 |
| KRT13         | 7,30378                         | 5,70044 | 8,87036 | 6,61471 | 6,84549 | 4,58496 | 4,70044 | 6,22882 | 3,45943 | 7,66534 |
| AIFM2         | 7,53138                         | 6,49185 | 7,74819 | 6,37504 | 6,37504 | 4,00000 | 5,24793 | 6,00000 | 2,80735 | 6,72792 |
| AKR1C2        | 4,70044                         | 7,69349 | 6,79442 | 8,20457 | 8,66534 | 3,90689 | 7,45121 | 7,03342 | 2,80735 | 5,95420 |
| SLC16A1       | 7,40088                         | 8,19476 | 7,62936 | 7,33092 | 8,26209 | 4,39232 | 5,42626 | 5,08746 | 5,88264 | 7,04439 |
| NOSTRIN       | 7,13955                         | 8,30378 | 6,08746 | 6,84549 | 7,24793 | 3,58496 | 6,50779 | 5,39232 | 6,12928 | 6,02237 |
| MUC17         | 8,21917                         | 6,62936 | 6,20945 | 6,33985 | 8,11894 | 3,45943 | 6,71425 | 4,85798 | 4,45943 | 6,94251 |
| KIF13A        | 7,39232                         | 6,37504 | 6,55459 | 7,31288 | 6,39232 | 4,08746 | 6,32193 | 6,08746 | 4,85798 | 6,40939 |
| TNNI2         | 7,19967                         | 7,74147 | 8,04439 | 6,28540 | 5,78136 | 3,80735 | 6,70044 | 3,16993 | 6,59991 | 4,45943 |
| CALB2         | 6,75489                         | 8,14975 | 6,85798 | 5,90689 | 7,33092 | 4,90689 | 5,49185 | 2,32193 | 4,75489 | 6,35755 |

|            |          |         |         |         |          |         |         |         |         |         |
|------------|----------|---------|---------|---------|----------|---------|---------|---------|---------|---------|
| FABP1      | 10,04712 | 6,35755 | 6,28540 | 9,19229 | 6,47573  | 3,45943 | 5,04439 | 1,58496 | 4,90689 | 6,18982 |
| LYPD6B     | 5,80735  | 5,45943 | 5,67243 | 5,72792 | 4,80735  | 3,00000 | 4,70044 | 4,52356 | 3,70044 | 2,80735 |
| PASK       | 4,95420  | 4,85798 | 4,75489 | 5,35755 | 5,04439  | 2,58496 | 4,24793 | 4,45943 | 3,00000 | 3,32193 |
| GLMN       | 5,85798  | 4,70044 | 4,64386 | 6,22882 | 4,58496  | 3,45943 | 4,52356 | 3,32193 | 4,00000 | 2,32193 |
| BTNL9      | 5,58496  | 4,45943 | 6,84549 | 6,62936 | 2,80735  | 2,32193 | 5,32193 | 4,39232 | 2,32193 | 2,32193 |
| PF4        | 5,16993  | 5,90689 | 5,67243 | 7,93664 | 6,00000  | 1,58496 | 5,55459 | 2,80735 | 2,80735 | 2,00000 |
| DKK3       | 5,97728  | 6,35755 | 7,51570 | 6,18982 | 3,45943  | 2,32193 | 5,12928 | 3,45943 | 4,90689 | 3,70044 |
| SPRR1A     | 7,70044  | 2,32193 | 6,00000 | 6,26679 | 4,90689  | 0,00000 | 3,90689 | 5,58496 | 2,32193 | 3,45943 |
| GYG2       | 5,52356  | 5,52356 | 5,88264 | 5,64386 | 4,58496  | 0,00000 | 6,40939 | 2,58496 | 0,00000 | 3,90689 |
| SLC17A9    | 6,06609  | 6,10852 | 5,67243 | 6,04439 | 6,78136  | 3,70044 | 5,08746 | 3,90689 | 0,00000 | 5,45943 |
| MYZAP      | 5,12928  | 5,28540 | 4,80735 | 5,45943 | 5,97728  | 3,00000 | 4,00000 | 4,32193 | 1,00000 | 4,95420 |
| MX1        | 4,70044  | 4,24793 | 6,02237 | 7,12928 | 5,55459  | 5,55459 | 5,12928 | 4,00000 | 0,00000 | 3,00000 |
| APBB1IP    | 5,64386  | 4,32193 | 5,24793 | 7,32193 | 4,64386  | 4,95420 | 4,85798 | 3,32193 | 0,00000 | 4,80735 |
| PPBP       | 6,04439  | 4,85798 | 5,70044 | 9,48382 | 2,00000  | 4,85798 | 4,64386 | 5,85798 | 0,00000 | 4,39232 |
| IFI27      | 5,32193  | 8,70736 | 4,24793 | 8,11894 | 11,98335 | 4,39232 | 3,58496 | 3,58496 | 5,24793 | 2,32193 |
| CLDN18     | 3,58496  | 7,99435 | 5,70044 | 4,00000 | 9,51964  | 5,20945 | 4,39232 | 7,39232 | 5,24793 | 0,00000 |
| ANKRD50    | 5,28540  | 5,24793 | 4,80735 | 4,24793 | 4,16993  | 6,42626 | 5,80735 | 5,04439 | 6,53916 | 5,52356 |
| PKIG       | 4,90689  | 5,00000 | 4,70044 | 3,58496 | 4,70044  | 6,45943 | 5,80735 | 5,16993 | 6,14975 | 5,28540 |
| SH3BP5     | 4,32193  | 4,70044 | 4,75489 | 4,24793 | 3,58496  | 6,24793 | 5,45943 | 4,58496 | 6,26679 | 5,35755 |
| ACAP1      | 4,08746  | 5,12928 | 5,16993 | 3,32193 | 4,52356  | 6,42626 | 6,84549 | 5,58496 | 4,90689 | 4,90689 |
| RNF144B    | 4,08746  | 4,16993 | 5,12928 | 2,00000 | 5,52356  | 5,83289 | 5,24793 | 5,70044 | 5,97728 | 5,72792 |
| ST6GAL2    | 4,52356  | 4,08746 | 4,45943 | 5,52356 | 4,64386  | 5,90689 | 5,42626 | 6,83289 | 6,53916 | 4,75489 |
| ZNF551     | 3,70044  | 4,45943 | 4,08746 | 4,75489 | 4,45943  | 5,72792 | 5,24793 | 5,55459 | 5,67243 | 5,04439 |
| ATF3       | 2,58496  | 4,90689 | 3,70044 | 2,58496 | 5,42626  | 4,70044 | 5,83289 | 7,58496 | 6,30378 | 4,00000 |
| FGA        | 2,58496  | 3,80735 | 5,08746 | 4,00000 | 3,00000  | 4,24793 | 5,85798 | 6,71425 | 5,90689 | 3,00000 |
| GZF1       | 4,32193  | 3,58496 | 2,58496 | 4,39232 | 3,70044  | 4,39232 | 4,95420 | 5,28540 | 6,49185 | 4,95420 |
| SESN3      | 5,35755  | 4,08746 | 2,58496 | 3,45943 | 2,00000  | 5,67243 | 4,32193 | 4,64386 | 7,45943 | 4,08746 |
| EVA1B      | 4,16993  | 3,45943 | 3,32193 | 3,80735 | 3,16993  | 7,11894 | 3,90689 | 4,45943 | 5,83289 | 5,42626 |
| CD14       | 2,32193  | 3,90689 | 3,80735 | 4,45943 | 2,58496  | 4,70044 | 4,08746 | 4,16993 | 7,20945 | 4,45943 |
| RAPGEF3    | 4,08746  | 3,00000 | 4,80735 | 2,58496 | 3,45943  | 5,64386 | 5,39232 | 5,55459 | 5,35755 | 3,45943 |
| PTHLH      | 3,58496  | 2,32193 | 4,08746 | 2,00000 | 2,32193  | 5,58496 | 5,45943 | 4,64386 | 4,52356 | 4,39232 |
| ADAMTS1    | 3,45943  | 2,80735 | 3,90689 | 4,16993 | 3,00000  | 5,49185 | 6,96578 | 5,28540 | 4,70044 | 3,32193 |
| UGT2B11    | 4,16993  | 1,58496 | 2,58496 | 6,08746 | 4,52356  | 2,58496 | 6,52356 | 6,64386 | 6,87036 | 6,70044 |
| UGT2B7     | 3,80735  | 4,32193 | 4,45943 | 5,45943 | 6,33985  | 5,95420 | 5,45943 | 6,45943 | 6,52356 | 6,90689 |
| FRG1B      | 4,32193  | 5,16993 | 3,00000 | 4,52356 | 5,64386  | 6,30378 | 5,80735 | 5,64386 | 6,06609 | 6,08746 |
| CENPC      | 4,58496  | 5,04439 | 3,00000 | 5,35755 | 5,55459  | 6,47573 | 4,80735 | 5,12928 | 5,52356 | 8,19476 |
| COPG2      | 4,16993  | 5,32193 | 3,32193 | 3,32193 | 5,04439  | 7,15987 | 4,52356 | 4,95420 | 4,45943 | 6,58496 |
| BEX5       | 3,32193  | 4,24793 | 3,80735 | 2,80735 | 5,39232  | 7,54689 | 2,58496 | 6,75489 | 5,49185 | 6,06609 |
| IFT52      | 4,90689  | 5,45943 | 5,58496 | 5,61471 | 4,70044  | 6,64386 | 5,80735 | 5,80735 | 6,75489 | 6,44294 |
| PEX11G     | 4,70044  | 4,70044 | 5,67243 | 5,08746 | 5,49185  | 6,87036 | 5,95420 | 5,42626 | 6,45943 | 6,14975 |
| PLEKHG5    | 5,55459  | 5,35755 | 4,90689 | 5,20945 | 6,12928  | 7,66534 | 6,00000 | 5,88264 | 6,06609 | 7,24793 |
| C4orf48    | 5,90689  | 3,90689 | 5,78136 | 5,70044 | 3,80735  | 8,25739 | 4,39232 | 6,28540 | 7,01123 | 6,74147 |
| NEDD8-MDP1 | 6,80735  | 7,05528 | 6,28540 | 6,42626 | 6,58496  | 7,78136 | 7,97154 | 7,20945 | 8,88264 | 6,74147 |
| CASP4      | 6,79442  | 6,62936 | 6,53916 | 5,83289 | 6,83289  | 7,98868 | 7,67243 | 7,44294 | 7,94837 | 6,82018 |
| GABBR1     | 6,68650  | 6,12928 | 6,26679 | 6,45943 | 6,12928  | 8,59619 | 7,82018 | 6,67243 | 7,78136 | 6,24793 |
| MDP1       | 6,20945  | 6,47573 | 5,49185 | 5,80735 | 5,97728  | 7,16993 | 7,37504 | 6,64386 | 8,27146 | 5,93074 |
| PFDN4      | 6,67243  | 6,24793 | 6,18982 | 6,45943 | 6,14975  | 7,98299 | 6,62936 | 6,91886 | 7,83289 | 7,54689 |
| MED21      | 6,52356  | 6,79442 | 5,24793 | 6,89482 | 6,47573  | 6,20945 | 7,72792 | 7,10852 | 8,23362 | 7,65105 |
| MAPK11     | 5,95420  | 5,85798 | 6,04439 | 5,90689 | 4,58496  | 8,08746 | 5,95420 | 7,26679 | 7,68650 | 6,74147 |
| PTK7       | 4,85798  | 5,97728 | 5,83289 | 5,49185 | 4,08746  | 8,40939 | 6,78136 | 7,12928 | 6,40939 | 6,26679 |
| LRG1       | 6,10852  | 6,08746 | 6,72792 | 4,70044 | 4,85798  | 6,89482 | 6,90689 | 6,82018 | 7,83289 | 5,72792 |
| PTGES      | 7,51570  | 5,85798 | 6,35755 | 6,50779 | 5,20945  | 9,72451 | 7,74819 | 7,26679 | 7,20945 | 7,15987 |
| HLA-DMA    | 6,30378  | 3,90689 | 7,12928 | 2,80735 | 6,78136  | 8,40939 | 7,63662 | 7,03342 | 7,48382 | 4,45943 |
| CST6       | 5,83289  | 4,52356 | 3,80735 | 5,28540 | 3,90689  | 8,55459 | 6,14975 | 5,32193 | 7,53138 | 4,39232 |
| UBD        | 5,24793  | 3,58496 | 4,90689 | 4,32193 | 3,16993  | 8,40514 | 7,09803 | 2,80735 | 7,12928 | 4,58496 |
| EFEMP1     | 6,62936  | 5,08746 | 3,32193 | 3,58496 | 2,00000  | 7,12928 | 6,72792 | 5,64386 | 6,30378 | 6,39232 |
| MFAP5      | 7,68650  | 1,00000 | 1,00000 | 5,52356 | 4,90689  | 9,77643 | 7,36632 | 5,35755 | 6,65821 | 6,90689 |
| ZNF765     | 5,16993  | 4,85798 | 4,52356 | 4,52356 | 4,58496  | 1,00000 | 3,80735 | 4,00000 | 4,58496 | 2,80735 |
| CREG2      | 4,39232  | 4,32193 | 3,90689 | 4,52356 | 5,04439  | 1,58496 | 3,45943 | 3,80735 | 3,90689 | 2,32193 |
| SLC9A4     | 4,80735  | 5,12928 | 4,52356 | 4,32193 | 4,85798  | 0,00000 | 2,58496 | 2,80735 | 4,52356 | 3,00000 |
| PSAPL1     | 4,75489  | 4,75489 | 5,08746 | 5,72792 | 6,49185  | 0,00000 | 3,16993 | 4,08746 | 3,90689 | 2,32193 |
| UVSSA      | 4,58496  | 5,70044 | 5,83289 | 5,04439 | 4,90689  | 1,58496 | 4,58496 | 5,04439 | 2,32193 | 0,00000 |
| TLR6       | 4,39232  | 5,00000 | 3,45943 | 4,95420 | 5,85798  | 0,00000 | 3,16993 | 4,00000 | 2,32193 | 0,00000 |

|               |         |         |         |         |         |         |         |         |         |         |
|---------------|---------|---------|---------|---------|---------|---------|---------|---------|---------|---------|
| TMEM231       | 4,52356 | 4,45943 | 4,45943 | 4,52356 | 4,00000 | 3,45943 | 2,58496 | 2,00000 | 3,16993 | 3,00000 |
| GRK4          | 4,90689 | 4,64386 | 4,52356 | 4,24793 | 2,00000 | 4,08746 | 2,32193 | 2,58496 | 2,32193 | 2,00000 |
| IRAK2         | 4,39232 | 4,52356 | 3,90689 | 5,35755 | 4,58496 | 4,90689 | 3,16993 | 3,16993 | 2,00000 | 1,58496 |
| BPIFB1        | 5,00000 | 4,08746 | 5,93074 | 4,52356 | 3,70044 | 3,80735 | 3,32193 | 3,16993 | 4,32193 | 0,00000 |
| SEC16B        | 4,70044 | 5,55459 | 4,45943 | 2,80735 | 3,16993 | 2,32193 | 4,08746 | 2,32193 | 3,00000 | 1,00000 |
| RUSC2         | 4,24793 | 4,08746 | 3,90689 | 3,58496 | 3,90689 | 2,58496 | 2,32193 | 3,00000 | 1,00000 | 0,00000 |
| AGAP5         | 4,00000 | 4,95420 | 4,64386 | 4,90689 | 3,58496 | 2,32193 | 4,08746 | 3,58496 | 2,00000 | 3,00000 |
| AGMO          | 4,32193 | 4,32193 | 4,95420 | 4,39232 | 4,85798 | 0,00000 | 3,80735 | 3,32193 | 1,00000 | 3,32193 |
| SLC35F3       | 5,39232 | 5,39232 | 4,90689 | 3,45943 | 3,32193 | 1,58496 | 4,58496 | 3,58496 | 0,00000 | 3,16993 |
| SIMC1         | 3,80735 | 4,08746 | 5,00000 | 2,58496 | 4,95420 | 3,32193 | 2,58496 | 2,80735 | 1,00000 | 2,80735 |
| CIDEC         | 3,32193 | 3,80735 | 5,08746 | 4,00000 | 4,32193 | 2,32193 | 2,00000 | 1,58496 | 0,00000 | 2,58496 |
| TNFRSF1B      | 4,64386 | 5,49185 | 5,08746 | 4,90689 | 6,49185 | 3,58496 | 4,52356 | 2,32193 | 1,00000 | 2,80735 |
| MOGAT3        | 4,39232 | 4,75489 | 4,90689 | 4,85798 | 5,20945 | 2,00000 | 4,32193 | 2,32193 | 0,00000 | 3,90689 |
| CYP4F2        | 2,58496 | 6,10852 | 5,00000 | 3,32193 | 7,33092 | 3,00000 | 4,85798 | 2,80735 | 0,00000 | 3,32193 |
| ANK1          | 3,32193 | 6,20945 | 6,74147 | 4,45943 | 5,83289 | 3,45943 | 5,12928 | 4,58496 | 0,00000 | 0,00000 |
| PDZK1         | 4,39232 | 3,80735 | 3,90689 | 4,52356 | 1,58496 | 0,00000 | 3,45943 | 1,58496 | 0,00000 | 2,58496 |
| SHANK3        | 2,80735 | 3,00000 | 3,80735 | 4,85798 | 2,58496 | 0,00000 | 2,58496 | 2,00000 | 0,00000 | 3,00000 |
| TMEM27        | 4,58496 | 3,80735 | 3,00000 | 4,45943 | 2,80735 | 1,00000 | 3,58496 | 1,58496 | 0,00000 | 1,00000 |
| ADRA2C        | 2,80735 | 4,39232 | 4,90689 | 4,08746 | 2,00000 | 1,00000 | 3,80735 | 0,00000 | 1,00000 | 2,32193 |
| C2CD4A        | 3,32193 | 4,32193 | 6,24793 | 4,52356 | 3,58496 | 1,00000 | 2,80735 | 3,00000 | 0,00000 | 2,32193 |
| RNF157        | 2,00000 | 4,75489 | 4,39232 | 4,45943 | 3,00000 | 1,00000 | 3,45943 | 2,58496 | 1,00000 | 2,00000 |
| SOWAHD        | 1,58496 | 2,80735 | 4,45943 | 3,00000 | 4,00000 | 0,00000 | 2,58496 | 1,58496 | 0,00000 | 1,58496 |
| KCNH3         | 2,58496 | 1,00000 | 4,90689 | 4,90689 | 4,80735 | 3,00000 | 3,16993 | 0,00000 | 0,00000 | 2,32193 |
| USPL1         | 2,80735 | 3,32193 | 2,32193 | 4,90689 | 6,12928 | 1,58496 | 3,16993 | 3,45943 | 1,00000 | 2,58496 |
| EPSTI1        | 4,16993 | 3,00000 | 1,00000 | 6,26679 | 4,24793 | 1,58496 | 3,32193 | 1,58496 | 2,32193 | 1,00000 |
| PINLYP        | 3,58496 | 4,70044 | 4,64386 | 2,00000 | 2,00000 | 1,00000 | 2,00000 | 2,80735 | 2,32193 | 0,00000 |
| SLC13A3       | 3,90689 | 3,45943 | 5,39232 | 2,00000 | 1,00000 | 0,00000 | 2,00000 | 2,80735 | 2,32193 | 0,00000 |
| FOXO2         | 3,70044 | 4,39232 | 4,70044 | 3,45943 | 3,32193 | 0,00000 | 2,58496 | 4,00000 | 2,32193 | 0,00000 |
| IL1RL1        | 2,32193 | 4,64386 | 4,16993 | 3,00000 | 4,58496 | 0,00000 | 1,00000 | 2,00000 | 3,70044 | 0,00000 |
| GSTA1         | 2,00000 | 2,58496 | 5,12928 | 3,45943 | 4,58496 | 0,00000 | 1,00000 | 2,00000 | 3,00000 | 0,00000 |
| METTL21B      | 2,00000 | 5,35755 | 4,08746 | 3,45943 | 3,45943 | 1,00000 | 2,80735 | 1,00000 | 2,00000 | 0,00000 |
| SLC14A1       | 0,00000 | 4,80735 | 3,45943 | 3,45943 | 3,16993 | 1,58496 | 1,00000 | 2,32193 | 1,00000 | 0,00000 |
| ODAM          | 1,00000 | 5,49185 | 3,90689 | 0,00000 | 3,45943 | 0,00000 | 2,32193 | 1,58496 | 1,00000 | 0,00000 |
| DNHD1         | 4,08746 | 5,32193 | 4,70044 | 2,32193 | 4,80735 | 0,00000 | 4,08746 | 4,64386 | 0,00000 | 0,00000 |
| SULT1B1       | 2,80735 | 5,00000 | 3,16993 | 1,00000 | 6,12928 | 0,00000 | 3,80735 | 2,32193 | 0,00000 | 1,00000 |
| TMEM213       | 3,00000 | 7,79442 | 4,45943 | 1,58496 | 2,00000 | 0,00000 | 1,00000 | 4,45943 | 0,00000 | 1,00000 |
| SULT1C2       | 2,58496 | 5,24793 | 0,00000 | 3,90689 | 7,32193 | 0,00000 | 1,00000 | 1,00000 | 0,00000 | 1,00000 |
| GKN1          | 2,00000 | 6,90689 | 0,00000 | 0,00000 | 6,71425 | 0,00000 | 0,00000 | 1,00000 | 0,00000 | 0,00000 |
| CCNB3         | 4,00000 | 4,52356 | 0,00000 | 1,58496 | 4,90689 | 2,00000 | 2,00000 | 0,00000 | 0,00000 | 0,00000 |
| PGC           | 6,37504 | 5,16993 | 3,00000 | 0,00000 | 7,38370 | 4,70044 | 2,58496 | 0,00000 | 0,00000 | 3,45943 |
| RGN           | 2,58496 | 1,58496 | 3,32193 | 2,00000 | 1,58496 | 1,00000 | 1,00000 | 1,00000 | 0,00000 | 0,00000 |
| TUBA8         | 2,80735 | 2,00000 | 2,32193 | 2,32193 | 1,58496 | 0,00000 | 1,00000 | 1,00000 | 0,00000 | 0,00000 |
| CYP3A4        | 2,58496 | 2,00000 | 3,32193 | 1,58496 | 2,32193 | 0,00000 | 1,00000 | 1,00000 | 1,00000 | 1,00000 |
| C7orf31       | 3,45943 | 2,58496 | 2,32193 | 1,58496 | 2,32193 | 1,58496 | 0,00000 | 1,58496 | 0,00000 | 0,00000 |
| CTD-3193O13.9 | 3,00000 | 1,58496 | 3,16993 | 1,58496 | 2,00000 | 1,00000 | 0,00000 | 0,00000 | 0,00000 | 0,00000 |
| CA14          | 3,45943 | 3,70044 | 3,32193 | 2,00000 | 2,58496 | 0,00000 | 0,00000 | 1,58496 | 0,00000 | 0,00000 |
| ACRC          | 2,80735 | 3,70044 | 2,58496 | 2,80735 | 1,00000 | 0,00000 | 0,00000 | 1,00000 | 0,00000 | 0,00000 |
| NR1H4         | 2,32193 | 1,00000 | 2,58496 | 2,80735 | 2,58496 | 0,00000 | 0,00000 | 0,00000 | 0,00000 | 1,00000 |
| USP18         | 2,32193 | 0,00000 | 2,58496 | 3,58496 | 2,58496 | 1,00000 | 0,00000 | 0,00000 | 0,00000 | 0,00000 |
| VWCE          | 1,00000 | 1,00000 | 4,08746 | 1,58496 | 3,32193 | 1,00000 | 0,00000 | 0,00000 | 0,00000 | 0,00000 |
| C12orf60      | 2,58496 | 2,58496 | 0,00000 | 3,00000 | 3,90689 | 0,00000 | 0,00000 | 1,00000 | 0,00000 | 0,00000 |
| DNAH12        | 1,58496 | 3,00000 | 0,00000 | 2,58496 | 3,45943 | 0,00000 | 0,00000 | 0,00000 | 0,00000 | 0,00000 |
| ZNF239        | 1,58496 | 2,80735 | 1,00000 | 2,00000 | 4,08746 | 0,00000 | 1,00000 | 0,00000 | 1,00000 | 0,00000 |
| CYP2C19       | 2,58496 | 1,00000 | 0,00000 | 2,32193 | 4,16993 | 0,00000 | 0,00000 | 1,00000 | 0,00000 | 0,00000 |
| FHAD1         | 1,00000 | 1,00000 | 0,00000 | 2,80735 | 4,00000 | 0,00000 | 0,00000 | 1,00000 | 0,00000 | 0,00000 |
| TIMP4         | 2,00000 | 2,32193 | 1,00000 | 2,58496 | 4,39232 | 0,00000 | 0,00000 | 1,58496 | 0,00000 | 1,00000 |
| C11orf86      | 2,80735 | 2,32193 | 0,00000 | 0,00000 | 3,45943 | 0,00000 | 0,00000 | 0,00000 | 0,00000 | 0,00000 |
| RAET1G        | 2,58496 | 2,00000 | 0,00000 | 0,00000 | 3,58496 | 0,00000 | 0,00000 | 0,00000 | 0,00000 | 0,00000 |
| GCK           | 2,80735 | 1,58496 | 0,00000 | 0,00000 | 3,00000 | 0,00000 | 0,00000 | 0,00000 | 0,00000 | 0,00000 |
| RASSF9        | 2,58496 | 2,32193 | 1,00000 | 1,00000 | 2,00000 | 0,00000 | 0,00000 | 1,00000 | 0,00000 | 0,00000 |
| PGF           | 1,58496 | 2,32193 | 3,16993 | 1,00000 | 1,58496 | 0,00000 | 0,00000 | 1,00000 | 0,00000 | 0,00000 |
| SYNC          | 1,00000 | 2,00000 | 3,00000 | 1,00000 | 2,00000 | 0,00000 | 0,00000 | 1,00000 | 0,00000 | 0,00000 |
| KCNQ4         | 1,58496 | 2,80735 | 3,00000 | 0,00000 | 1,58496 | 0,00000 | 0,00000 | 1,00000 | 0,00000 | 0,00000 |



|              |         |         |         |         |         |         |         |         |         |         |
|--------------|---------|---------|---------|---------|---------|---------|---------|---------|---------|---------|
| C1orf177     | 1,58496 | 2,32193 | 2,58496 | 0,00000 | 3,00000 | 0,00000 | 0,00000 | 0,00000 | 0,00000 | 0,00000 |
| RP56KA6      | 2,80735 | 3,32193 | 3,32193 | 0,00000 | 2,00000 | 0,00000 | 0,00000 | 1,58496 | 0,00000 | 0,00000 |
| TCTE1        | 1,58496 | 2,80735 | 3,32193 | 2,58496 | 3,00000 | 0,00000 | 0,00000 | 2,58496 | 0,00000 | 0,00000 |
| LNP1         | 1,00000 | 3,00000 | 3,00000 | 2,32193 | 3,45943 | 0,00000 | 0,00000 | 2,00000 | 0,00000 | 0,00000 |
| KCNH8        | 1,00000 | 3,32193 | 4,80735 | 0,00000 | 4,16993 | 0,00000 | 0,00000 | 1,58496 | 0,00000 | 0,00000 |
| PRSS21       | 0,00000 | 0,00000 | 6,44294 | 1,00000 | 2,32193 | 0,00000 | 0,00000 | 1,00000 | 0,00000 | 0,00000 |
| SALL1        | 3,90689 | 2,32193 | 3,16993 | 0,00000 | 0,00000 | 0,00000 | 0,00000 | 0,00000 | 0,00000 | 0,00000 |
| GRIN3B       | 2,32193 | 3,00000 | 3,16993 | 0,00000 | 0,00000 | 0,00000 | 0,00000 | 0,00000 | 0,00000 | 0,00000 |
| KCNN1        | 2,32193 | 1,00000 | 3,32193 | 0,00000 | 1,00000 | 0,00000 | 0,00000 | 0,00000 | 0,00000 | 0,00000 |
| KCNS1        | 1,58496 | 0,00000 | 3,90689 | 1,58496 | 0,00000 | 0,00000 | 0,00000 | 0,00000 | 0,00000 | 0,00000 |
| GATA5        | 3,32193 | 3,70044 | 4,90689 | 3,70044 | 2,00000 | 3,70044 | 0,00000 | 1,00000 | 1,00000 | 2,00000 |
| CDHR3        | 2,80735 | 2,80735 | 3,70044 | 3,00000 | 2,00000 | 2,32193 | 0,00000 | 1,58496 | 1,00000 | 1,00000 |
| SLC11A1      | 2,58496 | 4,08746 | 3,90689 | 3,00000 | 3,58496 | 3,45943 | 2,32193 | 0,00000 | 0,00000 | 1,00000 |
| HHIP         | 2,58496 | 4,32193 | 4,16993 | 1,00000 | 3,45943 | 3,32193 | 0,00000 | 0,00000 | 0,00000 | 0,00000 |
| CNTN1        | 4,70044 | 3,45943 | 4,52356 | 3,00000 | 2,80735 | 0,00000 | 2,00000 | 0,00000 | 1,00000 | 2,32193 |
| CNTNAP2      | 2,80735 | 3,16993 | 3,80735 | 3,32193 | 3,32193 | 0,00000 | 0,00000 | 0,00000 | 0,00000 | 2,58496 |
| COL4A1       | 5,42626 | 4,08746 | 3,32193 | 5,12928 | 2,80735 | 2,32193 | 0,00000 | 0,00000 | 0,00000 | 1,58496 |
| SLC6A12      | 4,70044 | 3,45943 | 5,24793 | 3,00000 | 1,58496 | 1,00000 | 1,00000 | 1,00000 | 4,24793 | 0,00000 |
| PTGER2       | 3,16993 | 3,80735 | 3,70044 | 3,45943 | 0,00000 | 0,00000 | 0,00000 | 0,00000 | 2,80735 | 1,00000 |
| NEURL2       | 2,32193 | 3,80735 | 2,32193 | 2,58496 | 2,58496 | 2,32193 | 1,00000 | 0,00000 | 0,00000 | 0,00000 |
| BRSK2        | 2,58496 | 3,00000 | 2,00000 | 2,00000 | 2,32193 | 1,00000 | 2,00000 | 0,00000 | 0,00000 | 0,00000 |
| FBLL1        | 2,00000 | 4,52356 | 0,00000 | 1,58496 | 2,00000 | 0,00000 | 1,00000 | 1,00000 | 0,00000 | 0,00000 |
| DIO1         | 2,00000 | 5,16993 | 2,32193 | 2,00000 | 0,00000 | 0,00000 | 1,00000 | 0,00000 | 0,00000 | 0,00000 |
| KLHL14       | 1,00000 | 2,58496 | 2,32193 | 2,00000 | 0,00000 | 0,00000 | 0,00000 | 0,00000 | 0,00000 | 0,00000 |
| SULT4A1      | 4,70044 | 1,58496 | 0,00000 | 4,24793 | 0,00000 | 0,00000 | 0,00000 | 0,00000 | 1,00000 | 0,00000 |
| LUM          | 5,49185 | 2,32193 | 0,00000 | 2,32193 | 0,00000 | 0,00000 | 0,00000 | 0,00000 | 0,00000 | 0,00000 |
| UCHL1        | 3,16993 | 1,00000 | 1,00000 | 3,45943 | 1,00000 | 0,00000 | 0,00000 | 0,00000 | 0,00000 | 1,00000 |
| PALMD        | 2,32193 | 2,32193 | 1,00000 | 3,90689 | 0,00000 | 0,00000 | 0,00000 | 0,00000 | 0,00000 | 0,00000 |
| CES4A        | 3,16993 | 3,80735 | 2,00000 | 3,32193 | 3,00000 | 1,00000 | 0,00000 | 1,00000 | 0,00000 | 1,00000 |
| AC022498.1   | 2,32193 | 3,32193 | 1,00000 | 3,80735 | 2,58496 | 0,00000 | 0,00000 | 1,58496 | 0,00000 | 1,00000 |
| CELSR3       | 3,70044 | 3,45943 | 2,32193 | 2,80735 | 3,16993 | 0,00000 | 0,00000 | 3,58496 | 0,00000 | 1,58496 |
| SCUBE2       | 2,58496 | 3,58496 | 4,16993 | 4,70044 | 0,00000 | 1,00000 | 0,00000 | 3,32193 | 0,00000 | 0,00000 |
| CCDC74A      | 4,24793 | 4,24793 | 4,75489 | 4,08746 | 5,00000 | 0,00000 | 2,00000 | 2,32193 | 0,00000 | 3,58496 |
| HPDL         | 4,39232 | 3,90689 | 4,70044 | 3,70044 | 4,08746 | 0,00000 | 1,00000 | 2,00000 | 0,00000 | 3,00000 |
| TM6SF2       | 3,32193 | 4,24793 | 4,52356 | 2,58496 | 4,70044 | 0,00000 | 2,58496 | 3,00000 | 0,00000 | 3,45943 |
| CYP1A1       | 3,16993 | 3,80735 | 5,88264 | 2,00000 | 4,24793 | 0,00000 | 1,00000 | 0,00000 | 0,00000 | 5,16993 |
| TMEM253      | 3,00000 | 3,45943 | 5,32193 | 3,70044 | 4,90689 | 0,00000 | 2,32193 | 1,58496 | 3,45943 | 4,08746 |
| PAH          | 1,58496 | 5,00000 | 5,95420 | 3,32193 | 6,53916 | 2,00000 | 1,00000 | 4,08746 | 3,00000 | 2,58496 |
| GKN2         | 3,90689 | 7,11894 | 3,16993 | 1,58496 | 7,52356 | 1,58496 | 1,00000 | 3,32193 | 0,00000 | 3,32193 |
| HEPH         | 7,56986 | 6,53916 | 8,65821 | 4,80735 | 6,28540 | 0,00000 | 2,80735 | 2,58496 | 1,00000 | 6,39232 |
| IL1R2        | 5,42626 | 4,32193 | 6,56986 | 5,61471 | 5,42626 | 4,00000 | 2,80735 | 3,90689 | 2,80735 | 4,39232 |
| GPA33        | 4,39232 | 5,24793 | 6,26679 | 6,00000 | 6,18982 | 2,58496 | 2,32193 | 3,58496 | 2,80735 | 4,80735 |
| CAPN9        | 5,12928 | 3,45943 | 5,67243 | 5,04439 | 6,88264 | 2,80735 | 3,32193 | 5,61471 | 4,16993 | 2,32193 |
| PRODH        | 4,85798 | 2,58496 | 6,80735 | 6,83289 | 7,58496 | 5,16993 | 1,00000 | 5,49185 | 3,70044 | 4,32193 |
| FAM211A      | 5,00000 | 3,90689 | 6,28540 | 4,90689 | 4,08746 | 3,70044 | 0,00000 | 0,00000 | 4,52356 | 3,80735 |
| MMP24        | 4,70044 | 3,45943 | 4,95420 | 6,65821 | 2,00000 | 2,00000 | 1,00000 | 3,58496 | 4,16993 | 3,45943 |
| IRF8         | 2,00000 | 6,79442 | 6,04439 | 4,24793 | 0,00000 | 3,00000 | 2,58496 | 0,00000 | 0,00000 | 1,58496 |
| SLC6A19      | 0,00000 | 4,08746 | 7,52356 | 5,61471 | 2,00000 | 1,00000 | 2,00000 | 0,00000 | 0,00000 | 0,00000 |
| MUC6         | 0,00000 | 7,42626 | 8,71768 | 4,95420 | 0,00000 | 4,32193 | 0,00000 | 2,32193 | 2,00000 | 0,00000 |
| SYNE1        | 3,16993 | 1,00000 | 3,00000 | 1,00000 | 0,00000 | 5,20945 | 3,16993 | 3,00000 | 3,58496 | 2,80735 |
| ZIK1         | 2,00000 | 1,58496 | 2,00000 | 0,00000 | 0,00000 | 4,08746 | 2,58496 | 2,80735 | 5,35755 | 3,16993 |
| IL2RG        | 1,00000 | 2,58496 | 3,32193 | 0,00000 | 1,58496 | 5,20945 | 3,58496 | 3,16993 | 2,80735 | 2,58496 |
| IFITM1       | 2,32193 | 1,58496 | 0,00000 | 0,00000 | 0,00000 | 5,49185 | 2,32193 | 3,00000 | 4,95420 | 1,00000 |
| GNA15        | 1,00000 | 2,32193 | 0,00000 | 0,00000 | 1,00000 | 4,00000 | 2,00000 | 4,39232 | 3,45943 | 2,32193 |
| CCNA1        | 0,00000 | 0,00000 | 1,00000 | 1,00000 | 0,00000 | 6,08746 | 3,32193 | 4,24793 | 3,45943 | 1,58496 |
| ICAM1        | 2,00000 | 1,00000 | 0,00000 | 0,00000 | 3,80735 | 5,97728 | 4,08746 | 3,16993 | 3,16993 | 3,32193 |
| C21orf67     | 2,00000 | 0,00000 | 0,00000 | 0,00000 | 1,58496 | 4,85798 | 2,00000 | 3,32193 | 0,00000 | 3,16993 |
| C6orf100     | 2,58496 | 1,00000 | 0,00000 | 1,58496 | 1,00000 | 4,08746 | 4,52356 | 1,58496 | 3,00000 | 1,58496 |
| CDH5         | 0,00000 | 0,00000 | 0,00000 | 0,00000 | 0,00000 | 5,49185 | 3,90689 | 0,00000 | 3,16993 | 2,32193 |
| SLC16A14     | 1,58496 | 0,00000 | 0,00000 | 0,00000 | 1,58496 | 4,90689 | 2,00000 | 3,00000 | 3,00000 | 0,00000 |
| NKAPL        | 1,00000 | 0,00000 | 0,00000 | 0,00000 | 2,00000 | 3,90689 | 1,00000 | 3,32193 | 3,00000 | 1,58496 |
| RP11-297N6.4 | 0,00000 | 1,00000 | 0,00000 | 0,00000 | 0,00000 | 3,70044 | 0,00000 | 1,58496 | 3,90689 | 1,00000 |
| AKT3         | 0,00000 | 0,00000 | 0,00000 | 0,00000 | 0,00000 | 3,00000 | 0,00000 | 1,00000 | 4,16993 | 0,00000 |

|                |         |         |          |         |          |          |          |          |          |          |
|----------------|---------|---------|----------|---------|----------|----------|----------|----------|----------|----------|
| CALCB          | 0,00000 | 0,00000 | 0,00000  | 0,00000 | 0,00000  | 4,32193  | 1,00000  | 0,00000  | 2,80735  | 1,00000  |
| S100A9         | 0,00000 | 0,00000 | 0,00000  | 0,00000 | 0,00000  | 5,00000  | 2,32193  | 1,00000  | 1,00000  | 0,00000  |
| GATA2          | 0,00000 | 0,00000 | 0,00000  | 0,00000 | 0,00000  | 2,58496  | 2,00000  | 1,58496  | 1,00000  | 0,00000  |
| SYT5           | 1,00000 | 1,00000 | 0,00000  | 1,00000 | 0,00000  | 2,80735  | 2,00000  | 2,58496  | 2,00000  | 2,32193  |
| LRRC48         | 1,00000 | 0,00000 | 0,00000  | 0,00000 | 0,00000  | 1,00000  | 2,00000  | 1,58496  | 3,16993  | 2,00000  |
| HLA-DRA        | 0,00000 | 2,00000 | 0,00000  | 0,00000 | 0,00000  | 4,16993  | 0,00000  | 2,80735  | 5,49185  | 0,00000  |
| CDKL1          | 1,58496 | 2,32193 | 1,00000  | 2,32193 | 1,00000  | 3,80735  | 3,32193  | 2,00000  | 3,58496  | 4,08746  |
| MT1G           | 0,00000 | 3,00000 | 0,00000  | 2,32193 | 1,58496  | 3,45943  | 2,58496  | 2,32193  | 4,58496  | 4,16993  |
| SOX8           | 1,58496 | 3,45943 | 0,00000  | 1,00000 | 1,58496  | 2,00000  | 2,80735  | 5,00000  | 5,35755  | 3,80735  |
| GABRB3         | 2,00000 | 3,45943 | 1,00000  | 0,00000 | 3,90689  | 3,32193  | 5,32193  | 1,00000  | 4,95420  | 6,06609  |
| DHRS2          | 1,00000 | 1,58496 | 2,00000  | 0,00000 | 3,70044  | 0,00000  | 4,24793  | 3,58496  | 5,12928  | 6,40939  |
| ST8SIA6        | 0,00000 | 0,00000 | 0,00000  | 1,58496 | 1,00000  | 0,00000  | 4,39232  | 3,80735  | 4,45943  | 3,00000  |
| ZFP57          | 0,00000 | 0,00000 | 0,00000  | 0,00000 | 0,00000  | 0,00000  | 4,95420  | 3,45943  | 5,83289  | 2,32193  |
| SERPINB2       | 2,32193 | 1,00000 | 0,00000  | 2,58496 | 4,00000  | 5,72792  | 3,32193  | 1,00000  | 0,00000  | 7,39232  |
| CORO1A         | 2,58496 | 0,00000 | 0,00000  | 3,90689 | 2,58496  | 8,31288  | 4,85798  | 4,95420  | 5,24793  | 5,52356  |
| TMEM173        | 4,08746 | 0,00000 | 0,00000  | 1,58496 | 2,00000  | 6,45943  | 5,45943  | 5,16993  | 5,12928  | 4,16993  |
| MLF1           | 3,45943 | 1,00000 | 2,00000  | 3,32193 | 2,00000  | 5,83289  | 3,32193  | 5,45943  | 5,67243  | 5,55459  |
| FLI1           | 0,00000 | 1,58496 | 0,00000  | 4,16993 | 3,45943  | 4,80735  | 5,85798  | 4,32193  | 4,32193  | 4,95420  |
| DUSP10         | 4,08746 | 1,58496 | 0,00000  | 2,00000 | 1,58496  | 5,20945  | 4,39232  | 4,08746  | 2,32193  | 4,08746  |
| ADAMTS14       | 3,32193 | 1,00000 | 0,00000  | 2,58496 | 1,00000  | 5,42626  | 3,90689  | 4,08746  | 4,00000  | 3,70044  |
| CPE            | 3,80735 | 0,00000 | 0,00000  | 1,00000 | 0,00000  | 3,80735  | 3,80735  | 4,90689  | 2,00000  | 3,45943  |
| IQCG           | 3,00000 | 1,00000 | 0,00000  | 3,00000 | 2,00000  | 2,58496  | 3,58496  | 4,64386  | 3,90689  | 4,32193  |
| TCF15          | 2,58496 | 1,00000 | 3,32193  | 2,00000 | 2,58496  | 4,90689  | 4,39232  | 4,58496  | 2,00000  | 6,14975  |
| DCLK1          | 1,58496 | 3,00000 | 1,00000  | 3,32193 | 2,32193  | 7,22882  | 4,08746  | 3,70044  | 2,80735  | 3,32193  |
| CELF2          | 0,00000 | 3,16993 | 0,00000  | 1,58496 | 2,00000  | 7,15987  | 3,58496  | 4,95420  | 2,80735  | 1,58496  |
| IGFL1          | 2,80735 | 2,58496 | 2,32193  | 2,80735 | 0,00000  | 6,52356  | 3,90689  | 3,90689  | 4,90689  | 0,00000  |
| FOSB           | 2,80735 | 3,80735 | 0,00000  | 1,00000 | 1,58496  | 5,67243  | 6,89482  | 8,98584  | 0,00000  | 0,00000  |
| HLA-DQB1       | 5,12928 | 1,00000 | 0,00000  | 0,00000 | 5,88264  | 0,00000  | 0,00000  | 8,83920  | 7,97728  | 6,33985  |
| AC174470.1     | 7,37504 | 6,71425 | 7,73471  | 7,45121 | 6,83289  | 10,18239 | 7,69349  | 7,84549  | 9,09011  | 9,18735  |
| FAM195B        | 7,37504 | 6,68650 | 7,65821  | 7,39232 | 6,83289  | 10,17866 | 7,57743  | 7,83920  | 9,07146  | 9,17243  |
| CDKN2A         | 7,29462 | 6,87036 | 8,43045  | 8,05528 | 8,11374  | 10,38802 | 7,54689  | 7,27612  | 9,28309  | 9,33539  |
| HYAL2          | 8,33985 | 8,11894 | 8,88570  | 7,90689 | 8,11374  | 10,97011 | 7,95420  | 8,64746  | 8,93958  | 9,30150  |
| KRT16          | 8,18488 | 8,17493 | 7,78790  | 8,63300 | 8,29921  | 10,24436 | 7,15987  | 9,21432  | 8,97441  | 9,46964  |
| SH3BP5L        | 7,47573 | 7,42626 | 7,19967  | 6,98868 | 9,52552  | 10,10460 | 7,30378  | 9,04439  | 7,78790  | 10,08082 |
| PRMT1          | 7,60733 | 7,35755 | 7,83289  | 6,75489 | 8,60363  | 10,01262 | 7,33092  | 7,98868  | 8,33092  | 9,16491  |
| CTD-3214H19.16 | 7,65105 | 7,71425 | 8,36194  | 7,52356 | 7,45943  | 9,23840  | 8,34873  | 8,14466  | 9,58120  | 8,74819  |
| TRAPPC5        | 7,65105 | 7,71425 | 8,36194  | 7,52356 | 7,45943  | 9,23840  | 8,34873  | 8,14466  | 9,58120  | 8,74819  |
| DPCD           | 7,96578 | 7,92481 | 7,83289  | 7,89482 | 7,55459  | 8,83920  | 8,31288  | 8,31741  | 10,79279 | 7,96000  |
| C8orf59        | 7,01123 | 7,47573 | 7,10852  | 7,82018 | 8,07682  | 8,72451  | 7,95420  | 7,40939  | 10,04166 | 8,25267  |
| APLP1          | 8,08746 | 7,04439 | 8,56986  | 6,79442 | 7,78790  | 9,15987  | 8,35755  | 9,41574  | 9,31288  | 7,80735  |
| MT2A           | 6,47573 | 6,52356 | 7,62205  | 7,01123 | 5,70044  | 9,94251  | 8,72110  | 9,06609  | 9,98014  | 8,22882  |
| SERTAD1        | 7,34873 | 6,91886 | 6,91886  | 6,75489 | 7,09803  | 8,12928  | 8,00562  | 7,97728  | 8,23840  | 8,37069  |
| MGMT           | 6,33985 | 6,87036 | 6,26679  | 7,07682 | 7,17991  | 8,68650  | 7,29462  | 7,53138  | 8,58871  | 7,55459  |
| GALK1          | 5,52356 | 7,33985 | 7,15987  | 6,68650 | 7,53138  | 8,29462  | 8,09803  | 8,16491  | 8,13955  | 8,14466  |
| ZG16B          | 6,37504 | 7,45121 | 7,49185  | 6,37504 | 6,26679  | 9,00843  | 8,03342  | 7,26679  | 8,78790  | 6,61471  |
| OAZ2           | 6,93074 | 6,33985 | 6,55459  | 6,71425 | 7,79442  | 9,36194  | 7,00000  | 7,03342  | 7,15987  | 8,68650  |
| CCDC124        | 6,32193 | 6,16993 | 6,61471  | 5,93074 | 7,40939  | 9,09803  | 6,00000  | 7,06609  | 7,13955  | 8,38802  |
| TSSC4          | 6,78136 | 6,45943 | 7,54689  | 6,79442 | 7,84549  | 9,36194  | 6,47573  | 6,94251  | 8,51570  | 8,93074  |
| STMN2          | 7,01123 | 5,58496 | 3,80735  | 6,82018 | 5,08746  | 9,25974  | 8,54303  | 10,04029 | 9,98014  | 9,76155  |
| APOL1          | 8,75154 | 8,31741 | 8,92778  | 9,01123 | 9,85175  | 9,78627  | 10,42417 | 10,88417 | 10,36960 | 9,86882  |
| JUN            | 8,22882 | 8,99435 | 8,98584  | 9,07682 | 8,89482  | 9,73640  | 9,44915  | 11,39714 | 8,69697  | 9,02514  |
| IFITM2         | 9,21432 | 7,53138 | 10,24079 | 7,80090 | 8,35315  | 10,87958 | 9,87652  | 10,55075 | 10,34983 | 8,56605  |
| TSPAN13        | 8,45533 | 9,03342 | 8,35755  | 8,83289 | 9,28771  | 9,29002  | 9,95565  | 8,53916  | 11,88874 | 9,02514  |
| RNASET2        | 8,82018 | 8,17493 | 8,39232  | 7,80090 | 8,53138  | 9,82337  | 10,35094 | 9,62022  | 9,75822  | 7,36632  |
| EGR1           | 8,54303 | 8,27612 | 7,87036  | 8,55459 | 8,01681  | 7,94251  | 10,10591 | 10,91214 | 8,84235  | 7,45943  |
| SDF2L1         | 8,31741 | 7,85175 | 8,40939  | 8,87958 | 9,58496  | 10,49685 | 8,14975  | 8,69349  | 9,02237  | 11,64746 |
| U2AF2          | 7,77479 | 8,03342 | 8,54689  | 7,83920 | 10,20823 | 11,29175 | 7,83289  | 8,85487  | 8,54303  | 11,13443 |
| HNRNPA0        | 9,13699 | 9,08746 | 9,37504  | 8,87652 | 9,70044  | 9,80574  | 8,96000  | 9,26444  | 8,98299  | 13,91308 |
| SLC7A7         | 9,16491 | 8,70736 | 9,33985  | 9,22641 | 8,92778  | 5,70044  | 7,79442  | 8,52748  | 6,33985  | 8,64746  |
| B3GALT5        | 9,72281 | 8,60363 | 8,83605  | 8,65105 | 9,11634  | 5,55459  | 8,33539  | 7,53916  | 6,78136  | 8,81057  |
| LOXL4          | 9,80896 | 8,62571 | 9,45943  | 9,94105 | 7,67243  | 7,67948  | 8,58120  | 8,30834  | 8,33539  | 8,29462  |
| FKBP11         | 9,31515 | 9,43671 | 9,12928  | 8,48784 | 8,23362  | 7,92481  | 7,39232  | 7,72110  | 7,96000  | 7,53138  |
| ANO1           | 8,85487 | 9,21432 | 9,14720  | 8,82337 | 8,63662  | 7,63662  | 7,34873  | 7,82018  | 7,55459  | 7,88874  |

|            |          |          |          |          |          |          |          |          |          |          |
|------------|----------|----------|----------|----------|----------|----------|----------|----------|----------|----------|
| S100A4     | 9,21432  | 9,23601  | 9,17742  | 7,62205  | 8,70736  | 8,36632  | 6,79442  | 7,12928  | 7,40939  | 8,13955  |
| CAPN8      | 8,52356  | 9,73132  | 8,94544  | 8,88264  | 8,92481  | 6,44294  | 8,73132  | 7,72110  | 7,59991  | 6,89482  |
| IMPA2      | 7,75489  | 8,54689  | 8,98868  | 8,29462  | 8,77808  | 6,10852  | 7,79442  | 7,20945  | 7,51570  | 7,44294  |
| CA12       | 7,67243  | 9,33762  | 8,92481  | 7,75489  | 7,69349  | 7,37504  | 7,27612  | 7,70044  | 7,98299  | 6,37504  |
| SLC43A1    | 6,44294  | 8,45533  | 8,51964  | 9,03342  | 8,92481  | 6,40939  | 7,61471  | 8,25739  | 6,93074  | 6,74147  |
| ACSS1      | 7,98868  | 8,75489  | 8,24793  | 7,82018  | 8,51570  | 6,04439  | 7,78136  | 6,16993  | 6,83289  | 6,02237  |
| C2orf72    | 8,81378  | 7,83289  | 8,67243  | 7,89482  | 6,75489  | 5,32193  | 7,71425  | 7,06609  | 6,70044  | 6,58496  |
| SYT8       | 8,16993  | 9,43045  | 9,98014  | 7,20945  | 8,82972  | 7,33092  | 6,40939  | 5,08746  | 9,15482  | 7,08746  |
| MYEOV      | 9,54689  | 7,79442  | 9,43879  | 8,93664  | 7,93664  | 7,03342  | 7,30378  | 3,80735  | 6,78136  | 8,68299  |
| TSKU       | 7,28540  | 7,60733  | 7,52356  | 7,22882  | 8,16491  | 6,37504  | 6,35755  | 7,14975  | 5,95420  | 6,75489  |
| AUTS2      | 6,93074  | 7,97154  | 7,59246  | 7,56224  | 8,13955  | 5,90689  | 6,26679  | 7,00000  | 6,47573  | 6,45943  |
| AC073610.5 | 7,69349  | 7,73471  | 7,68650  | 6,95420  | 6,79442  | 6,40939  | 5,80735  | 6,47573  | 6,62936  | 6,02237  |
| ETV4       | 6,32193  | 6,87036  | 8,63662  | 7,02237  | 7,37504  | 6,88264  | 6,82018  | 6,18982  | 5,80735  | 6,04439  |
| FAM198B    | 7,33092  | 5,78136  | 6,47573  | 6,44294  | 7,93664  | 6,12928  | 6,32193  | 5,45943  | 6,04439  | 5,67243  |
| WSCD1      | 6,82018  | 7,30378  | 7,71425  | 8,47168  | 7,27612  | 5,58496  | 6,52356  | 5,97728  | 6,62936  | 6,94251  |
| SIRPA      | 7,87652  | 6,39232  | 7,00000  | 9,03892  | 6,40939  | 5,42626  | 6,65821  | 5,42626  | 6,62936  | 6,32193  |
| MYLK       | 8,68299  | 6,94251  | 7,08746  | 8,44294  | 5,97728  | 6,85798  | 6,06609  | 7,08746  | 6,06609  | 6,37504  |
| TM4SF5     | 8,52748  | 7,85175  | 8,51570  | 8,84235  | 8,56605  | 6,16993  | 7,01123  | 7,39232  | 5,39232  | 7,43463  |
| SLCO2B1    | 8,65105  | 7,85798  | 8,78136  | 7,65821  | 8,09803  | 5,75489  | 7,37504  | 5,75489  | 3,90689  | 7,94837  |
| AMN        | 7,09803  | 8,08746  | 7,49185  | 7,84549  | 8,09803  | 4,95420  | 7,06609  | 7,11894  | 5,20945  | 5,85798  |
| KLF2       | 7,28540  | 7,57743  | 6,89482  | 7,04439  | 8,61839  | 5,24793  | 6,40939  | 7,62205  | 3,58496  | 7,17991  |
| LGALS1     | 7,20945  | 9,47371  | 8,28540  | 8,71425  | 7,29462  | 7,07682  | 8,82655  | 7,44294  | 5,72792  | 2,80735  |
| NDRG4      | 10,90162 | 5,24793  | 7,67948  | 8,62936  | 5,24793  | 5,67243  | 8,05528  | 6,74147  | 6,47573  | 6,68650  |
| CNOT1      | 8,78463  | 9,04166  | 9,24793  | 13,58942 | 9,53722  | 8,04439  | 9,09540  | 9,31967  | 8,43045  | 9,25974  |
| AKR1B10    | 7,85175  | 9,53528  | 9,76818  | 10,40195 | 11,10525 | 7,00000  | 8,22882  | 7,61471  | 7,26679  | 9,30150  |
| GSTM4      | 9,92333  | 11,18177 | 10,62205 | 10,30720 | 9,55075  | 8,18488  | 9,67772  | 9,01681  | 7,37504  | 7,67948  |
| CEACAM5    | 10,28656 | 10,47573 | 11,27146 | 8,59991  | 11,19106 | 4,80735  | 7,63662  | 8,96000  | 6,82018  | 9,28771  |
| UGT1A1     | 10,89785 | 10,59898 | 8,30834  | 9,60733  | 9,67243  | 4,32193  | 8,15987  | 6,16993  | 6,52356  | 8,95710  |
| ALDH3A1    | 7,09803  | 12,01959 | 10,66000 | 7,47573  | 12,86438 | 7,97728  | 7,28540  | 7,10852  | 8,25267  | 9,68124  |
| PCK1       | 7,75489  | 11,52209 | 10,22521 | 7,65105  | 11,08547 | 7,29462  | 10,24793 | 7,70044  | 7,12928  | 6,30378  |
| DPCR1      | 8,47168  | 10,89026 | 7,12928  | 7,97154  | 11,01890 | 6,78136  | 4,52356  | 7,00000  | 4,24793  | 8,93074  |
| PSCA       | 9,43879  | 11,98335 | 6,80735  | 7,27612  | 6,79442  | 4,39232  | 6,56986  | 10,24079 | 6,18982  | 6,61471  |
| RPS5       | 10,67507 | 10,84392 | 11,60548 | 10,66000 | 11,39767 | 13,20105 | 11,49085 | 11,42522 | 12,70304 | 12,51274 |
| RPL18A     | 9,94398  | 10,48884 | 11,18549 | 10,35975 | 10,75405 | 11,56415 | 10,82416 | 12,29290 | 11,86225 | 11,17617 |
| ADAM15     | 9,52943  | 9,62022  | 10,14720 | 9,16491  | 11,51274 | 12,87094 | 10,13057 | 11,44139 | 10,36741 | 11,56367 |
| KLK10      | 12,14179 | 10,93884 | 9,13443  | 8,96578  | 11,55794 | 13,34207 | 9,82337  | 12,63095 | 12,43593 | 11,03136 |
| RPL6       | 9,83920  | 9,69870  | 9,69349  | 9,85953  | 9,79116  | 10,17742 | 10,29232 | 12,35590 | 10,22762 | 10,39124 |
| SPINK1     | 9,51964  | 9,40088  | 8,20457  | 9,30606  | 11,12412 | 9,27845  | 11,47523 | 12,27088 | 11,25267 | 10,34319 |
| SLC2A3     | 10,45635 | 8,80413  | 9,72622  | 10,22038 | 8,27146  | 11,66800 | 11,31232 | 10,97370 | 10,28077 | 11,05053 |
| TIMP2      | 12,11927 | 9,80252  | 11,01193 | 10,80977 | 9,21432  | 10,03617 | 10,15861 | 9,91139  | 9,51570  | 9,97871  |
| SPINK4     | 11,21614 | 11,16554 | 12,14530 | 10,47675 | 10,10591 | 8,58120  | 7,92481  | 9,84078  | 10,42206 | 10,34096 |
| MUC5AC     | 10,90989 | 11,66133 | 12,89936 | 12,18239 | 12,83881 | 10,79523 | 8,22882  | 11,12606 | 9,99718  | 9,51175  |
| MMP1       | 12,31430 | 14,04226 | 13,28179 | 13,26766 | 12,95529 | 9,40514  | 11,87114 | 11,45584 | 13,47649 | 12,52674 |
| REG4       | 12,86728 | 12,55746 | 14,61442 | 13,81328 | 13,55315 | 10,21675 | 10,57270 | 10,93295 | 11,28829 | 13,51138 |
| AQP3       | 11,84667 | 13,97719 | 13,62970 | 11,16993 | 11,15987 | 11,07548 | 11,19353 | 10,09408 | 12,59898 | 11,31515 |
| TFF2       | 10,88188 | 12,86225 | 12,33260 | 11,27903 | 12,83249 | 10,51274 | 10,82893 | 10,09144 | 11,45892 | 11,88798 |
| CYSTM1     | 13,31288 | 13,33497 | 13,99789 | 13,29247 | 13,24377 | 11,71596 | 12,99894 | 12,51274 | 12,49685 | 11,97298 |
| TFF1       | 11,79360 | 13,98789 | 13,21796 | 13,47485 | 14,92152 | 11,68475 | 13,01924 | 13,00440 | 12,10263 | 12,88760 |
| RPS9       | 11,80574 | 11,69957 | 12,42495 | 11,30435 | 12,54352 | 14,43313 | 11,90651 | 12,48003 | 12,79726 | 13,09358 |
